# Supplementary material for: Conflict with Parents in Adolescent Depression: Associations with Parental Interpersonal Problems and Depressive Symptoms
Source: PubMed Central journal article supplement (PMC7235051; doi:10.1007/s10578-020-00955-0), 2020-01-18

1

Mean b = 0.1

Mean a = 4.94

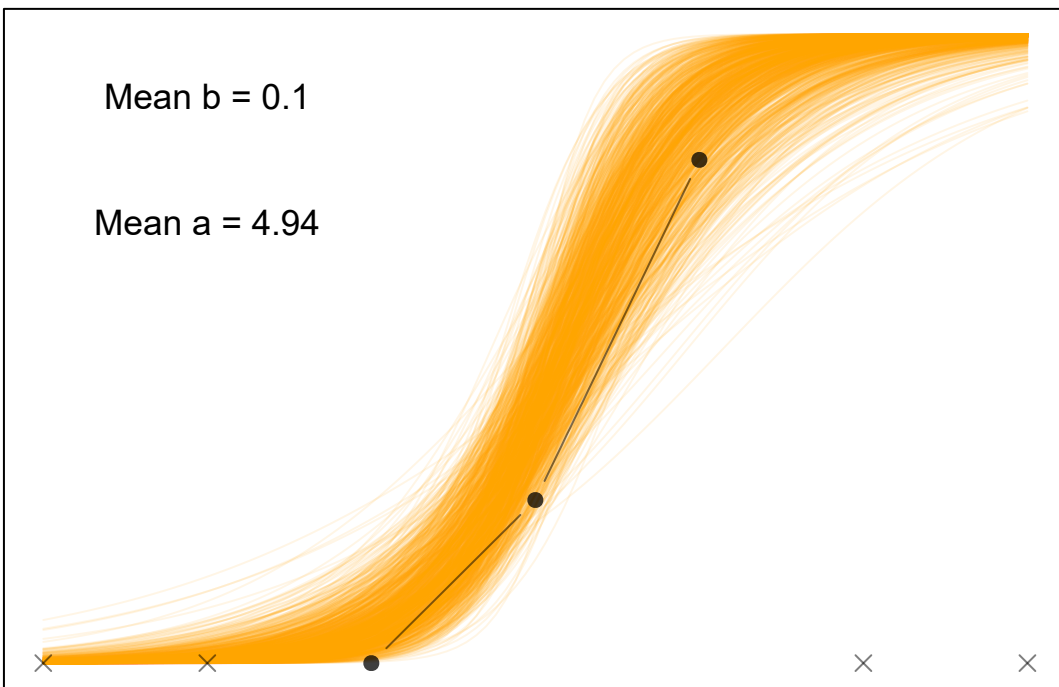

2

Mean b = -0.12

Mean a = 3.21

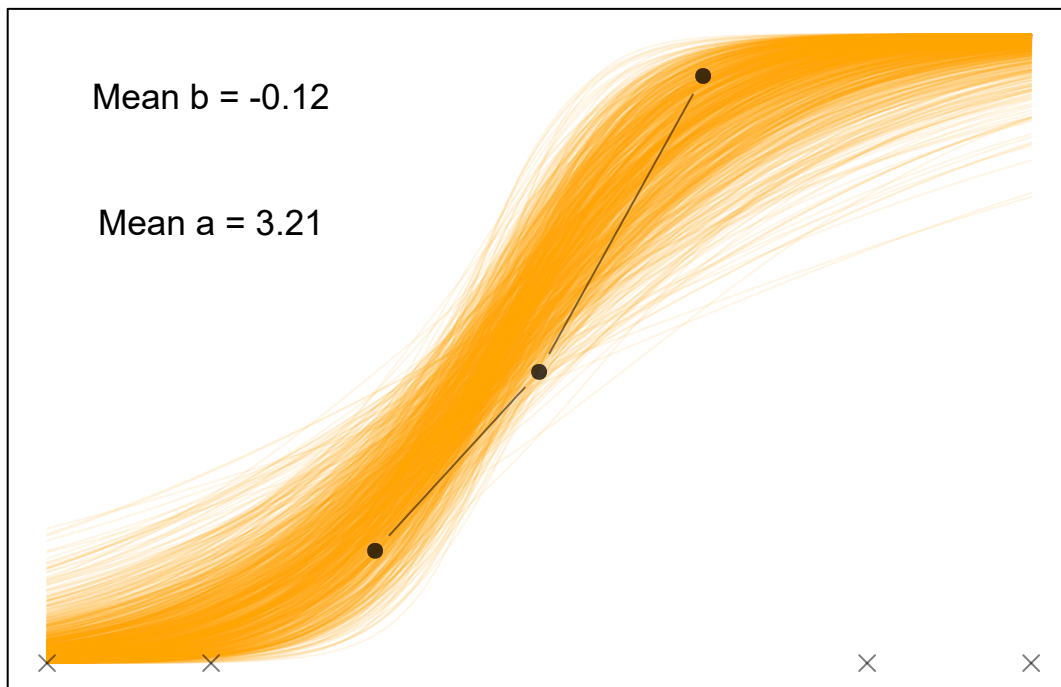

3

Mean b = 0.06

Mean a = 7.96

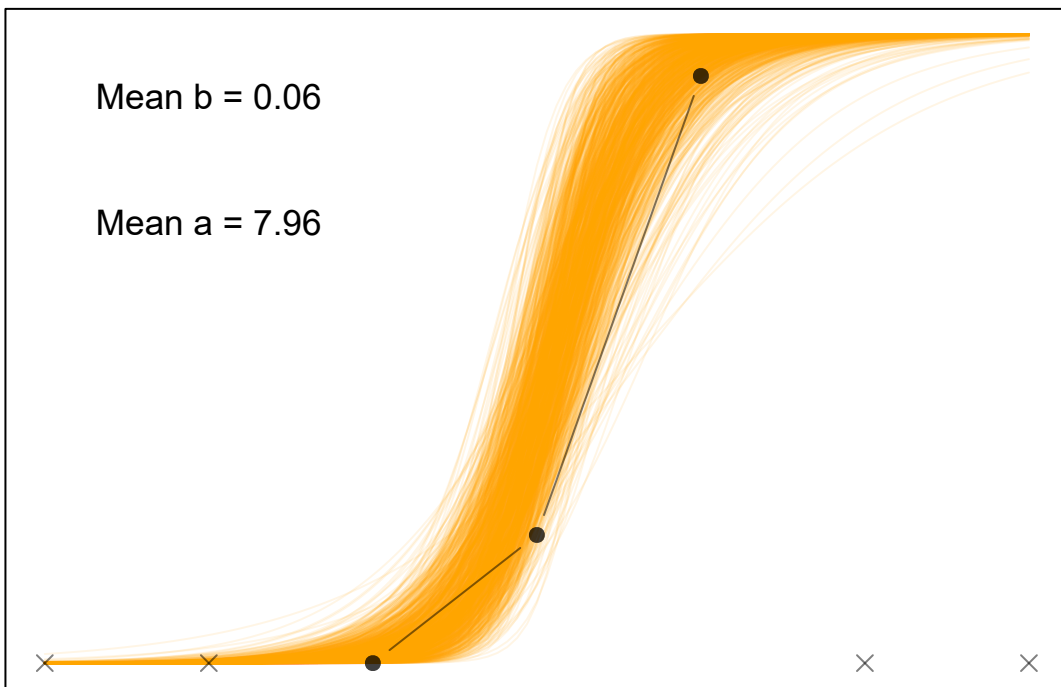

4

Mean b = 0.07

Mean a = 6.3

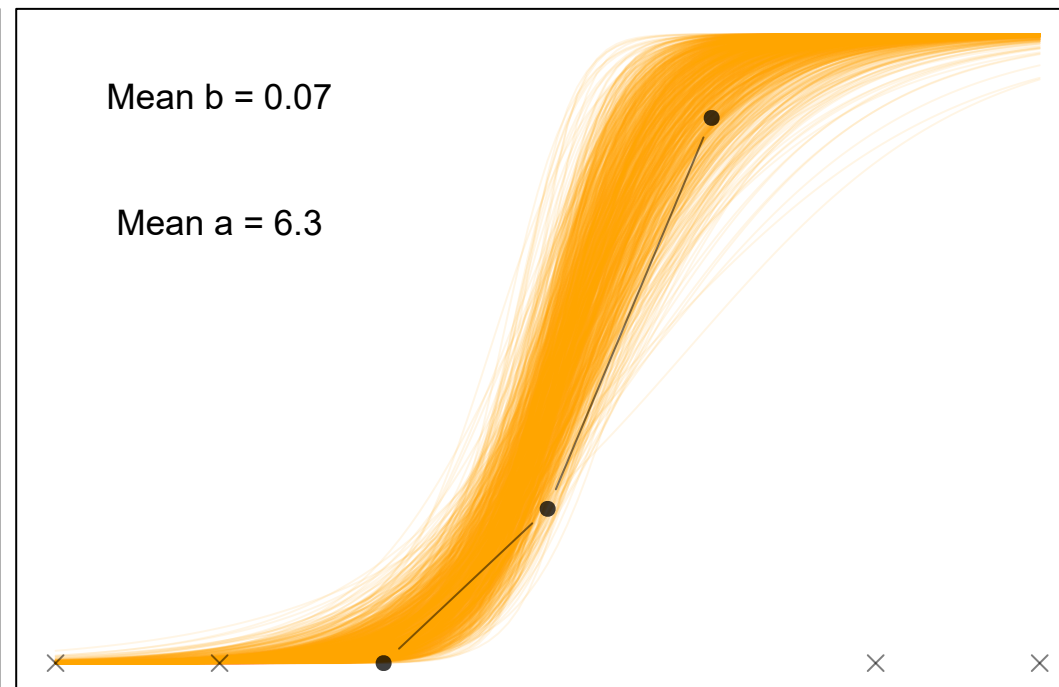

5

Mean b = -0.01

Mean a = 3.23

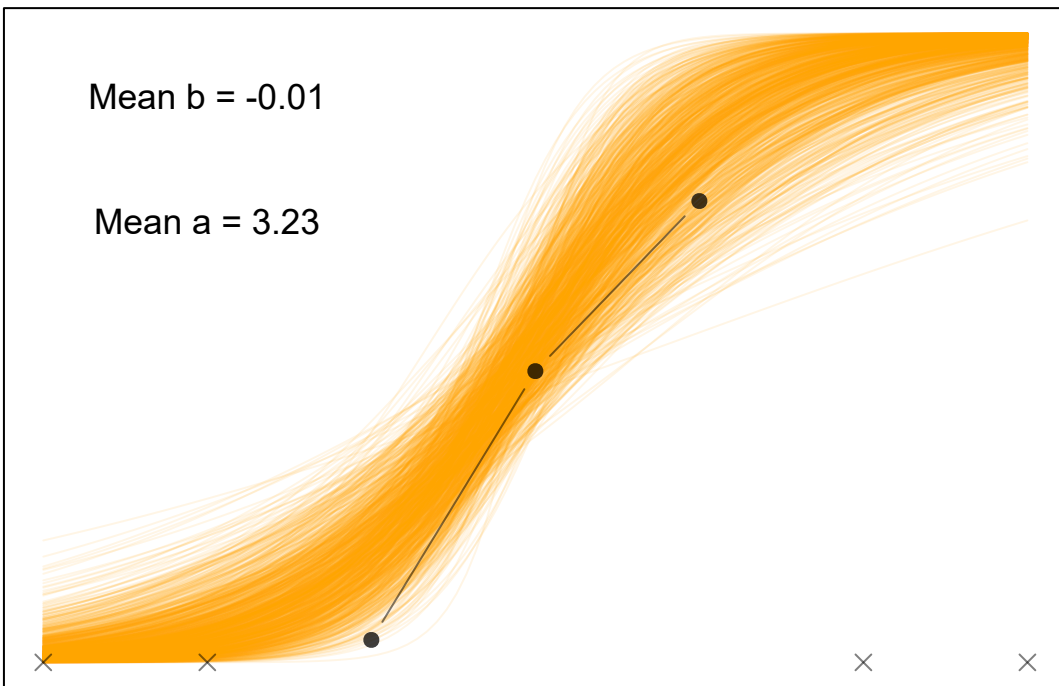

6

Mean b = -0.05

Mean a = 3.59

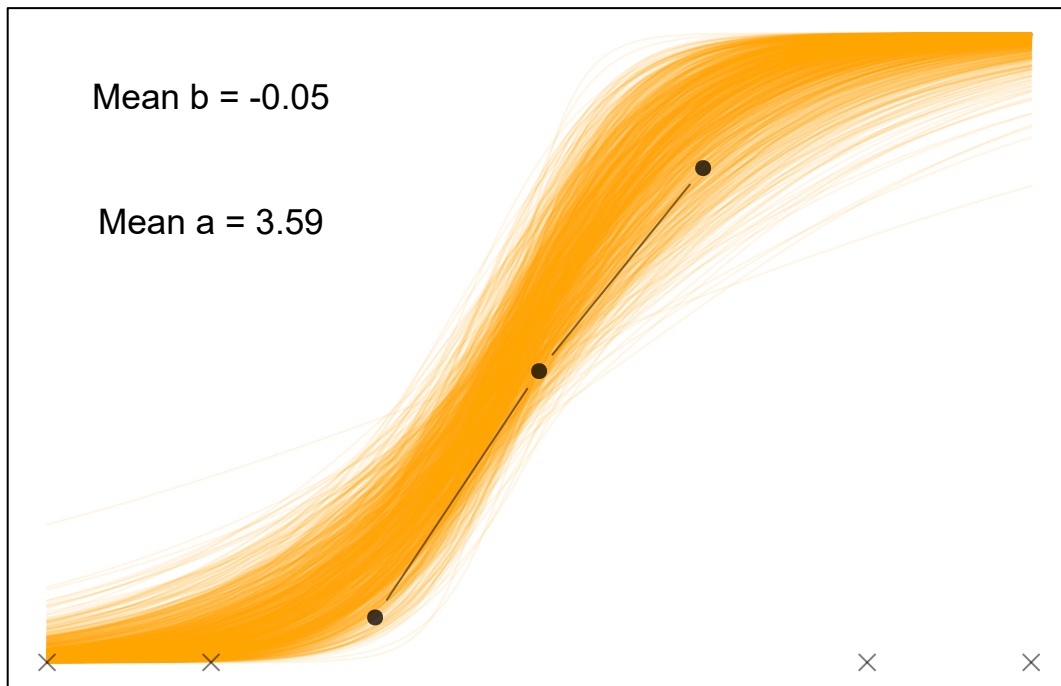

7

Mean b = 0.52

Mean a = 5.87

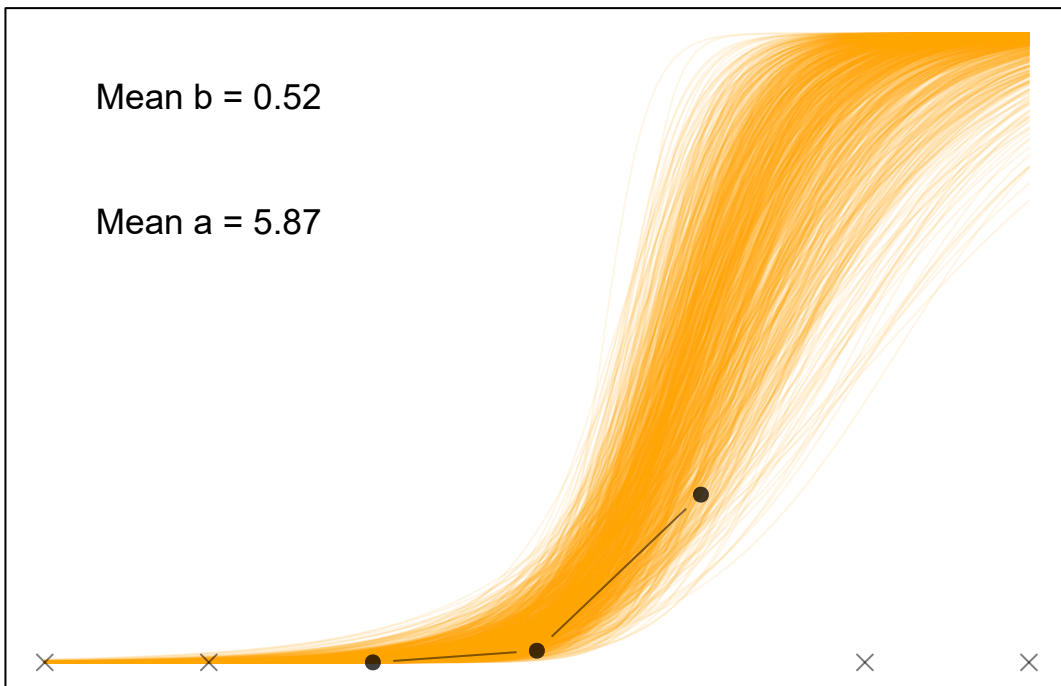

8

Mean b = -0.19

Mean a = 3.47

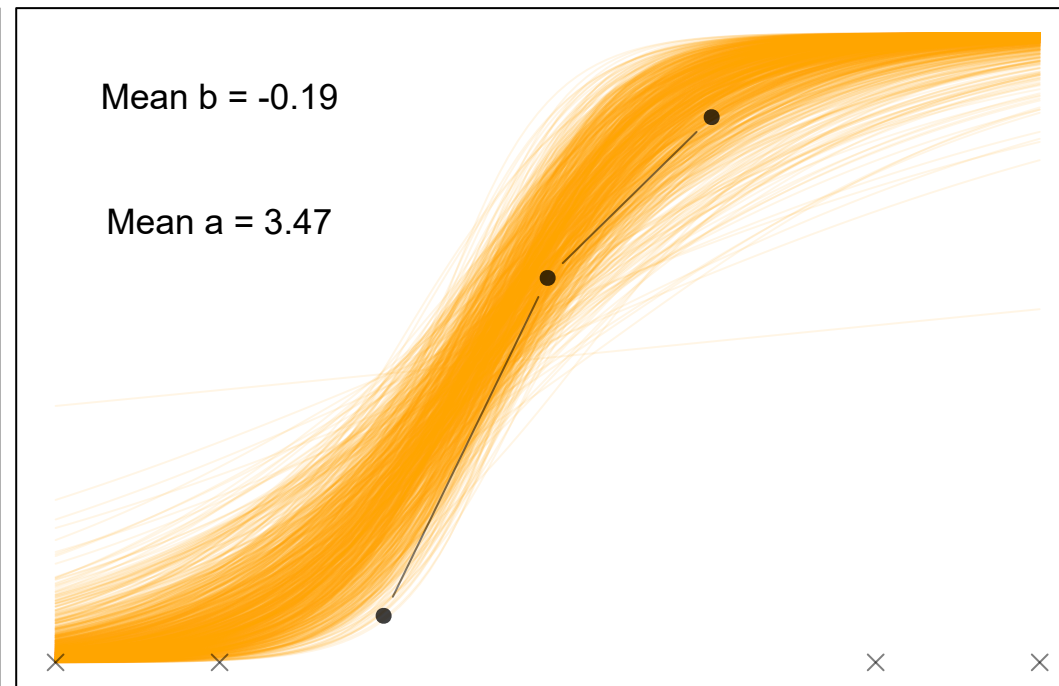

9

Mean b = 0.39

Mean a = 3.33

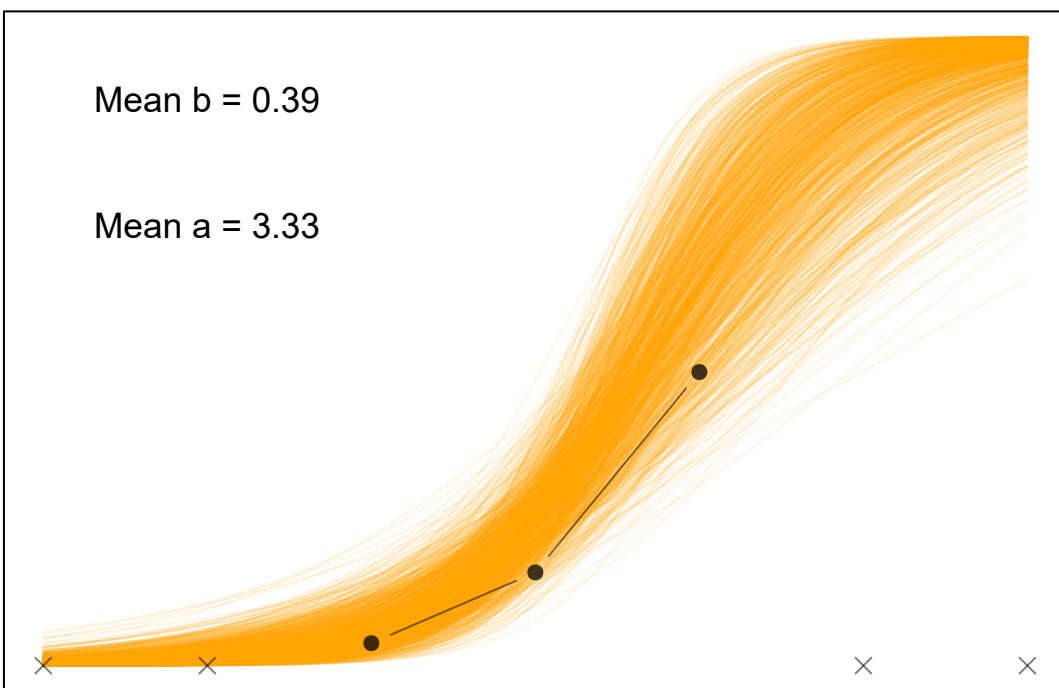

10

Mean b = 0.02

Mean a = 6.71

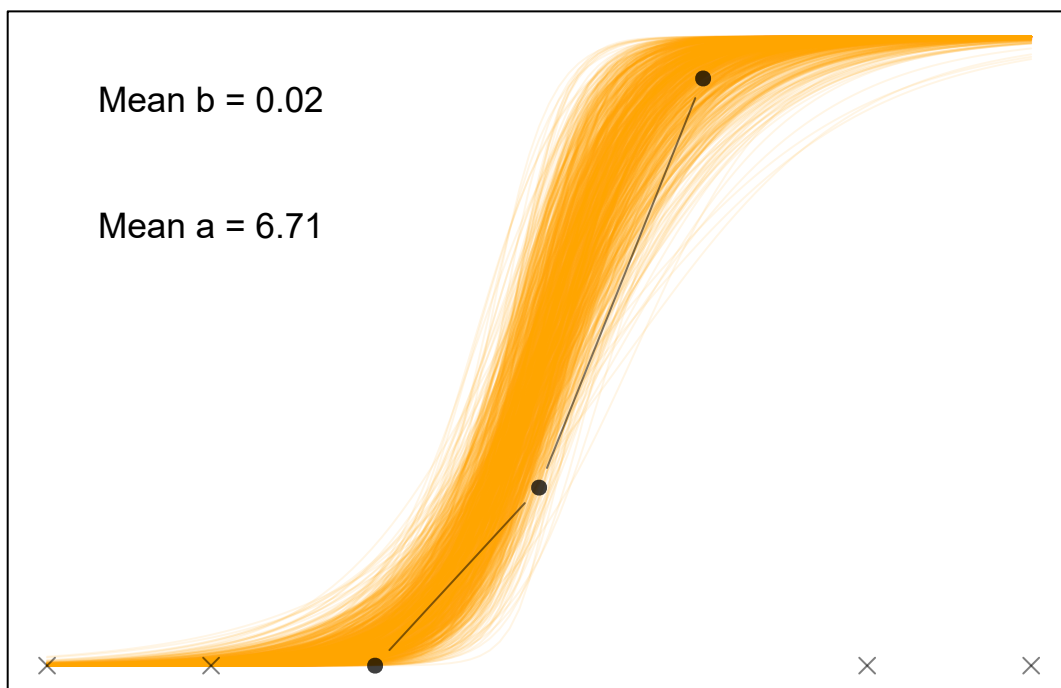

11

Mean b = 0.43

Mean a = 5.72

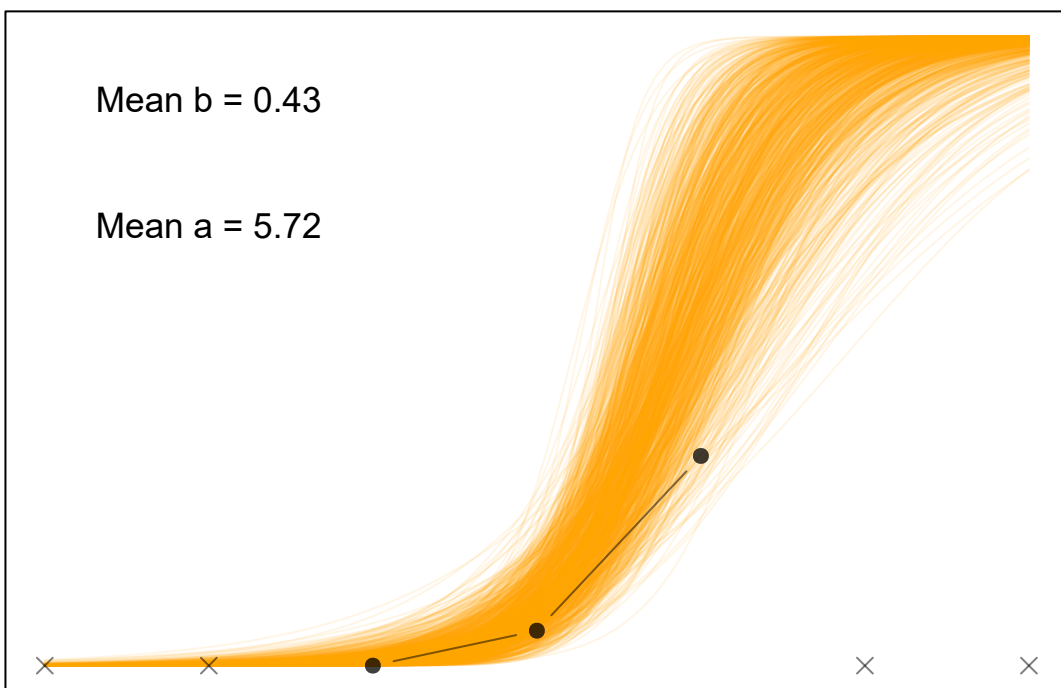

12

Mean b = 0.21

Mean a = 7.35

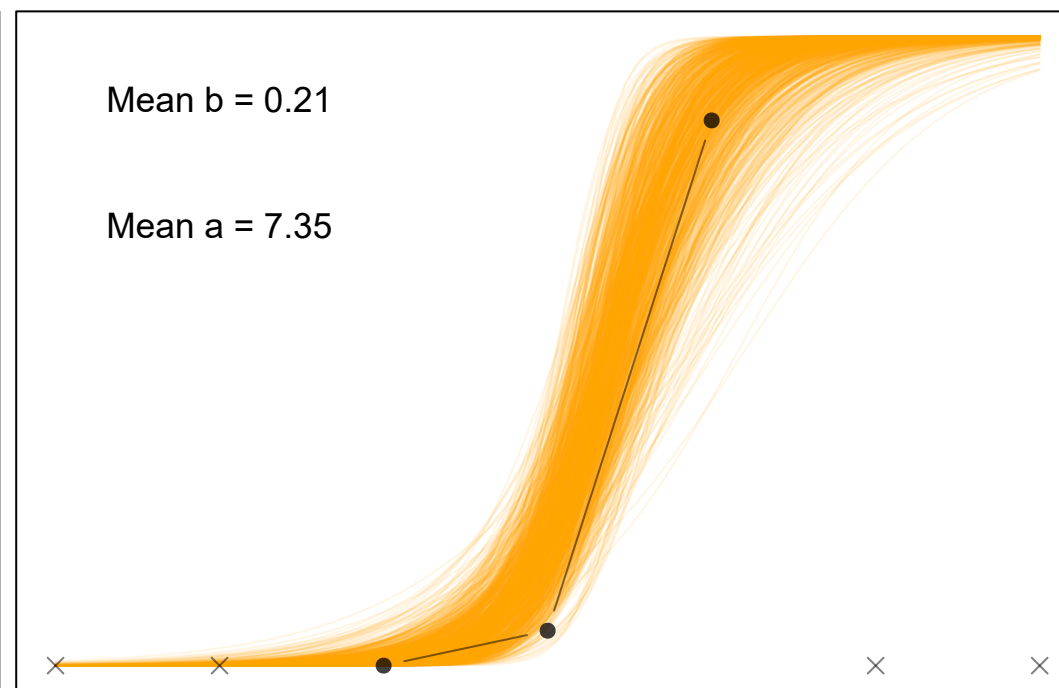

13

Mean b = 0.52

Mean a = 5.33

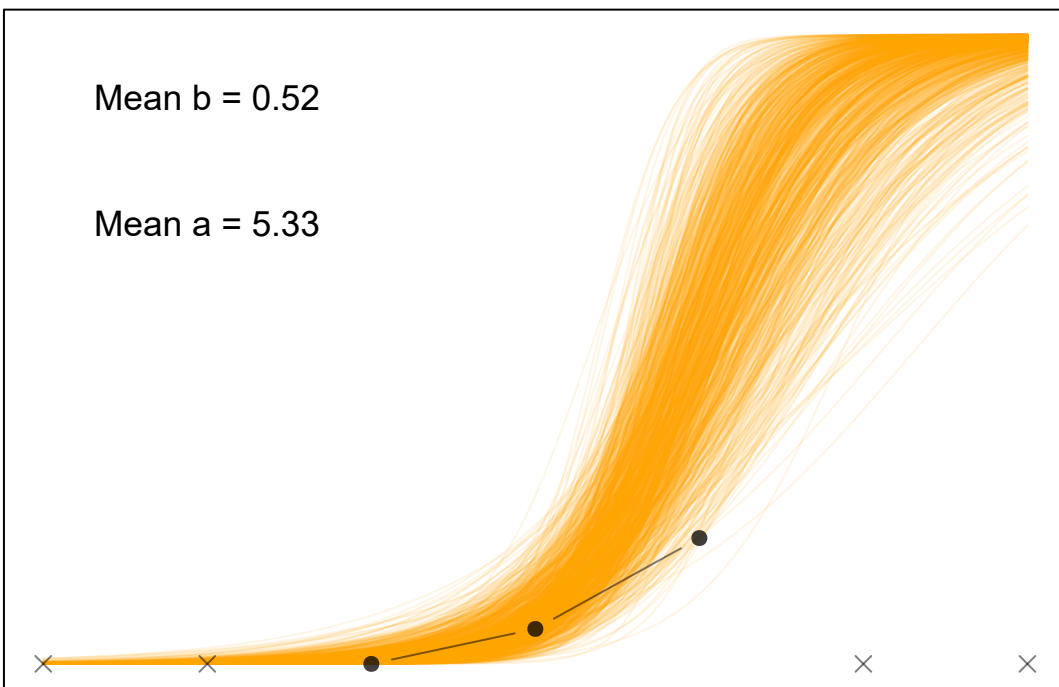

14

Mean b = 0.57

Mean a = 4.47

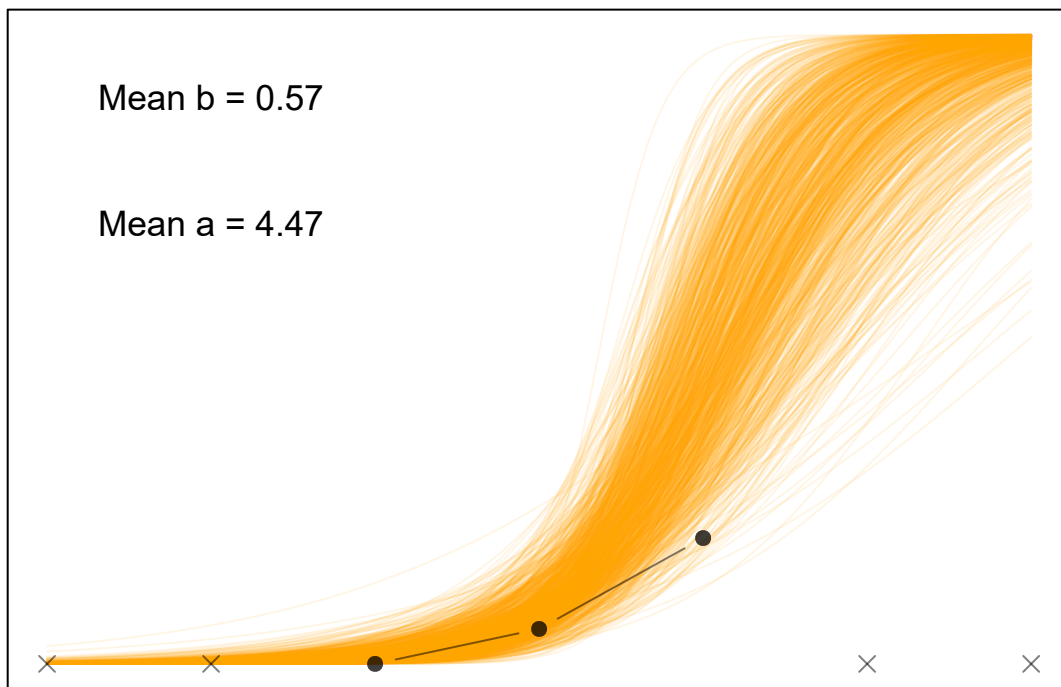

15

Mean b = 0.01

Mean a = 4.07

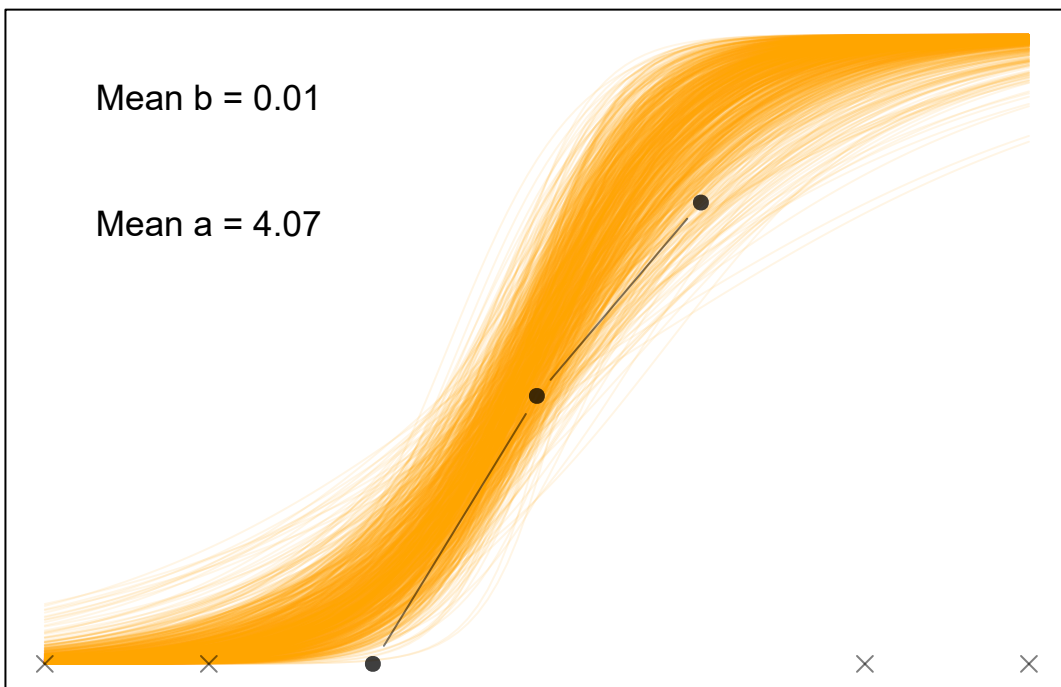

16

Mean b = 0.31

Mean a = 2.1

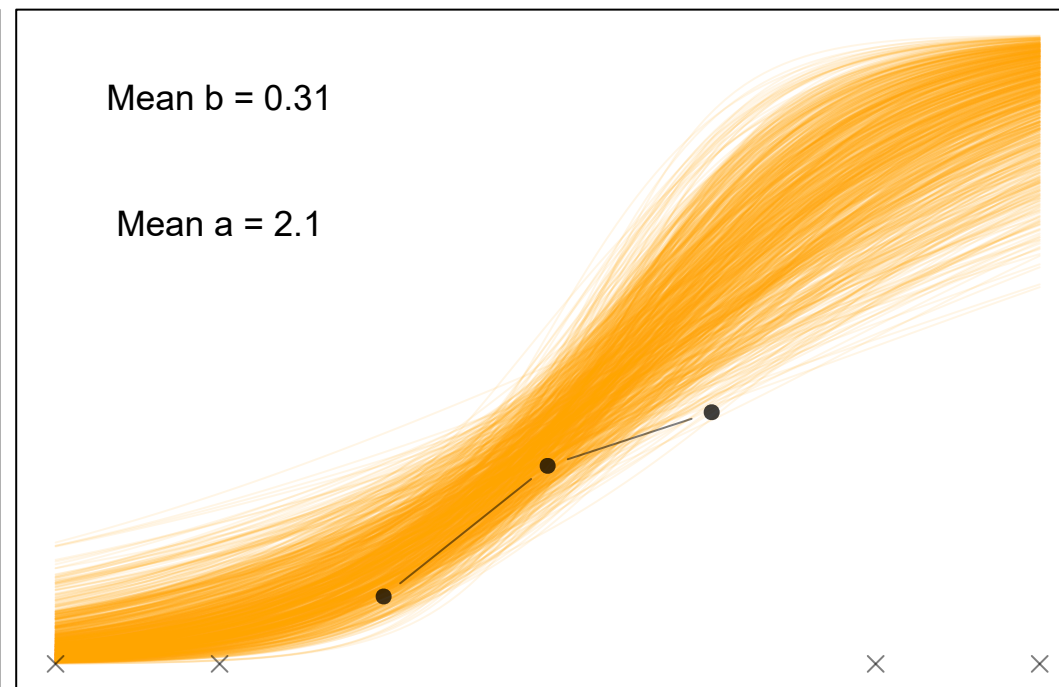

Supplement: 10578_2020_955_MOESM1_ESM.pdf [file 10578_2020_955_MOESM1_ESM.pdf]
